# Supplementary material for: A series of 4,5,9,10-tetrahydropyrene-based tetraarylethenes: synthesis, structures and solid-state emission behavior
Source: Royal Society of Chemistry journal article supplement (doi:10.1039/c8ra00057c), 2018-01-01
Supplement: c8ra00057c1.pdf [file c8ra00057c1.pdf]

## Supporting Information

### A series of 4,5,9,10-tetrahydropyrene-based tetraarylethenes: synthesis, structures and solid-state emission behaviors

Zhaoming Zhang <sup>a,b</sup>, Baoxi Miao <sup>a</sup>, Xinxue Tang <sup>a</sup>, Zhonghai Ni <sup>a,\*</sup>

<sup>a</sup> School of Chemical Engineering and Technology, China University of Mining and Technology,  
Xuzhou 221116, People's Republic of China

<sup>b</sup> Graduate School of Chemical Sciences and Engineering, Hokkaido University, Sapporo 001-0021,  
Japan

\* Corresponding author E-mail: nizhonghai@cumt.edu.cn; Tel: +86-516-83883927

**Table S1**

Crystal data and structure refinement parameters for compounds **1** and **4**

|                                                      | Compound <b>1</b>                  | Compound <b>4</b>               |
|------------------------------------------------------|------------------------------------|---------------------------------|
| Formula                                              | C <sub>35</sub> H <sub>28</sub>    | C <sub>56</sub> H <sub>44</sub> |
| Formula weight                                       | 460.58                             | 716.91                          |
| Temperature (K)                                      | 293(2)                             | 293(2)                          |
| Crystal system                                       | monoclinic                         | triclinic                       |
| Space group                                          | <i>P</i> 2 <sub>1</sub> / <i>c</i> | <i>P</i> -1                     |
| <i>a</i> (Å)                                         | 8.5141(17)                         | 8.1823(16)                      |
| <i>b</i> (Å)                                         | 17.426(4)                          | 12.694(3)                       |
| <i>c</i> (Å)                                         | 17.000(3)                          | 19.994(4)                       |
| $\alpha$ (°)                                         | 90.0000(0)                         | 90.14(3)                        |
| $\beta$ (°)                                          | 97.44(3)                           | 93.52(3)                        |
| $\gamma$ (°)                                         | 90.0000(0)                         | 101.80(3)                       |
| Volume (Å <sup>3</sup> )                             | 2500.9(9)                          | 2028.7(7)                       |
| <i>Z</i>                                             | 4                                  | 2                               |
| $\rho_{\text{calcd}}$ (g cm <sup>-3</sup> )          | 1.223                              | 1.174                           |
| $\mu$ (Mo - K $\alpha$ ) (mm <sup>-1</sup> )         | 0.069                              | 0.066                           |
| F(000)                                               | 976                                | 760                             |
| Crystal size (mm)                                    | 0.10 × 0.08 × 0.06                 | 0.08 × 0.08 × 0.06              |
| Independent reflections                              | 4387                               | 7079                            |
| Reflections [ <i>I</i> > 2 $\sigma$ ( <i>I</i> )]    | 3540                               | 4032                            |
| $\theta$ range (°)                                   | 3.19-25.00                         | 3.16-25.00                      |
| Goodness-of-fit on F <sup>2</sup>                    | 1.091                              | 1.051                           |
| R <sub>1</sub> [ <i>I</i> > 2 $\sigma$ ( <i>I</i> )] | 0.0832                             | 0.0816                          |
| wR <sub>2</sub> (all data)                           | 0.2169                             | 0.2150                          |
